# Supplementary material
Source: Springer Nature journal article supplement (https://www.springermedizin.de/resource/supplementary/12885_2013_4605_MOESM3_ESM.pdf/9466740)

Diagnosis of breast cancer

Death/End of follow-up

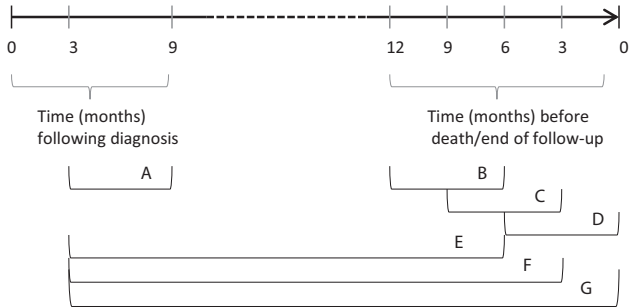

Supplement: MOESM3 [file 9466740]
